# Supplementary material for: Synthesis of (meth)acrylate water-borne latexes using amino-acid based surfactants: effect of surfactant on film properties
Source: Royal Society of Chemistry journal article supplement (doi:10.1039/c2py20278f), 2012-01-01
Supplement: c2py20278f.pdf [file c2py20278f.pdf]

## Supporting Information

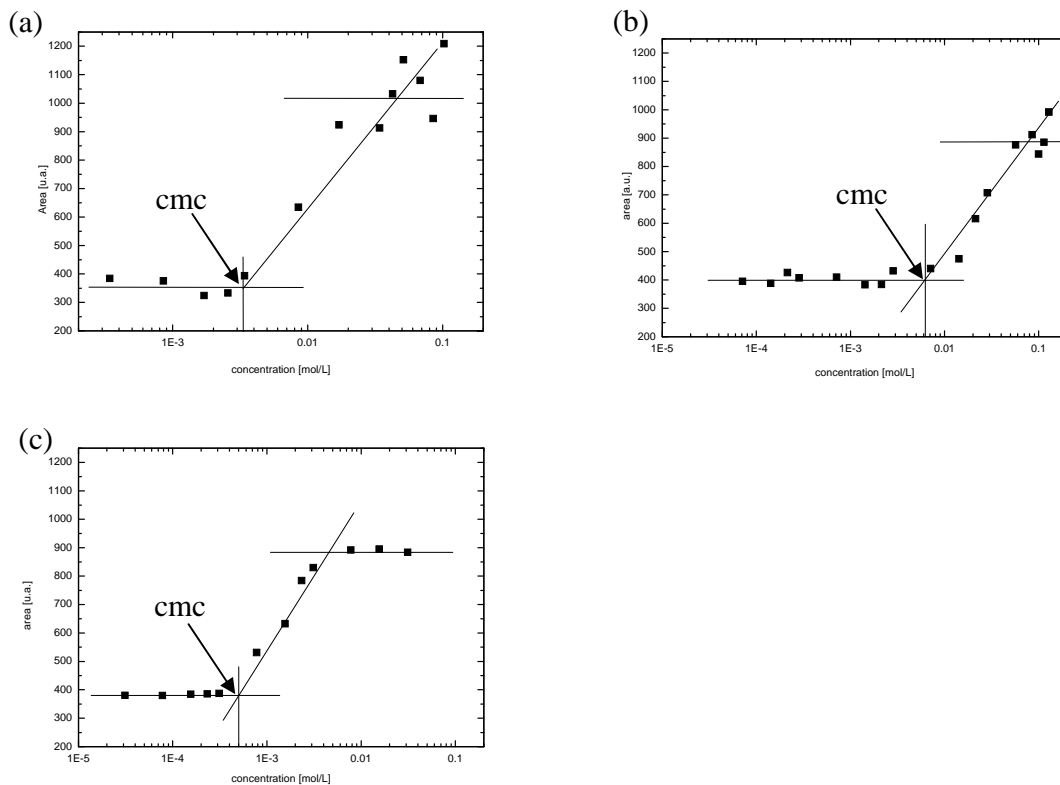

**Figure 1.** *cmc* determination of (a) SLSar, (b) SLGlu and (c) SMSar surfactants by fluorescence spectrophotometry using Nile red as the fluorescence probe. The arrows point the *cmc* values.

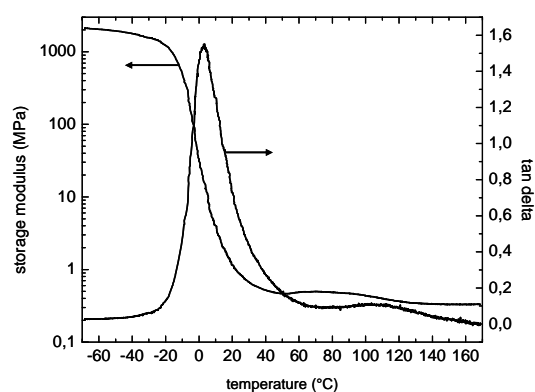

**Figure 2.** DMA trace of the SLSar-95 film.
